# Supplementary material for: Structural and electronic features enabling delocalized charge-carriers in CuSbSe2
Source: Springer Nature journal article supplement (doi:10.1038/s41467-024-55254-2), 2025-01-02
Supplement: MOESM2 [file 41467_2024_55254_MOESM2_ESM.pdf › Fu_et_al_2024_Supplementary_information/41467_2024_55254_MOESM2_ESM.pdf]

## **Description of Additional Supplementary Files:**

**Supplementary Data 1:** Optimized structure of CuSbSe<sub>2</sub> from calculations with PBE functional

**Supplementary Data 2:** Optimized structure of CuSbSe<sub>2</sub> from calculation with r2SCAN functional

**Supplementary Data 3:** Optimized structure of CuSbSe<sub>2</sub> from calculations with HSE06 functional
